# Supplementary material for: Predictors of the Development of Mental Disorders in Hospitalized COVID-19 Patients without Previous Psychiatric History: A Single-Center Retrospective Study in South Korea
Source: MDPI journal article supplement (doi:10.3390/ijerph19031092), 2022-01-19
Supplement: s1 [file s1]

## Supplemental Material

**Table S1.** Univariate and multivariate logistic analysis of predictors for newly developed mental disorder except delirium during hospitalization (sensitivity analysis).

|                                            | Univariate Analysis  |                | Multivariate Analysis |                |
|--------------------------------------------|----------------------|----------------|-----------------------|----------------|
|                                            | OR (95% CI)          | <i>p</i> Value | OR (95% CI)           | <i>p</i> Value |
| Age, years *                               | 1.027 (1.004–1.051)  | 0.020          |                       |                |
| Female sex (vs. male)                      | 1.318 (0.558–3.112)  | 0.529          |                       |                |
| Low education level (vs. high)             | 2.272 (0.961–5.369)  | 0.062          |                       |                |
| Unemployed (vs. employed)                  | 1.011 (0.441–2.320)  | 0.9792         |                       |                |
| CCI score core $\geq 1$ (vs. 0)            | 3.747 (1.536–9.140)  | 0.004          | 5.115 (1.737–15.058)  | 0.003          |
| Pneumonia (vs. no)                         | 2.729 (1.022–7.283)  | 0.045          |                       |                |
| Hospital length of stay, days <sup>†</sup> | 1.059 (1.030–1.089)  | <0.001         | 1.067 (1.035–1.100)   | <0.001         |
| Oxygen therapy (vs. no)                    | 5.231 (1.798–15.219) | 0.002          |                       |                |
| ICU admission (vs. no)                     | 4.000 (1.071–14.941) | 0.039          |                       |                |
| Depressive symptom (vs. no)                | 4.532 (1.732–11.864) | 0.002          | 5.357 (1.745–16.444)  | 0.003          |
| PTSD symptom <sup>‡</sup> (vs. no)         | <0.001               | >999.999       |                       |                |
| Suicide idea <sup>‡</sup> (vs. no)         | 3.667 (0.493–27.246) | 0.204          |                       |                |

OR = odds ratio, CI = confidence interval, CCI = Charlson comorbidity index, ICU = intensive care unit, PTSD = post-traumatic stress disorder, \* per 1-year increase, <sup>†</sup> per 1-day increase, <sup>‡</sup> reported on self-assessed psychological test at admission.

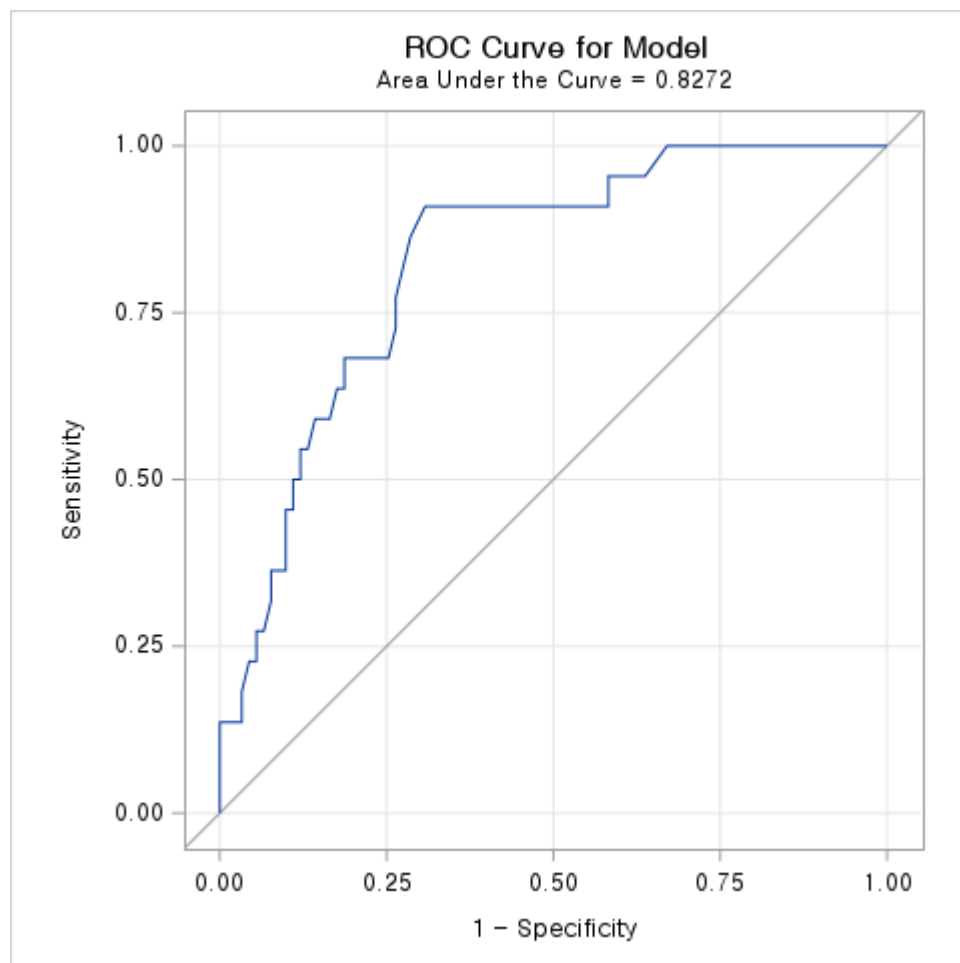

**Figure S1.** ROC curve and AUC of sensitivity analysis. ROC = receiver operating characteristic, AUC = area under curve.
